# Supplementary material for: Using Social Listening Data to Monitor Misuse and Nonmedical Use of Bupropion: A Content Analysis
Source: JMIR Public Health Surveill. 2017 Feb 1;3(1):e6. doi: 10.2196/publichealth.6174 (PMC5311422; doi:10.2196/publichealth.6174)
Supplement: Multimedia Appendix 6 [file publichealth_v3i1e6_app6.pdf]

|                                                                                                                                                                                                                                                                                   | <b>Bupropion<br/>(% of<br/>total<br/>Bupropion<br/>posts,<br/>N=438)</b> | <b>Amitriptyline<br/>(% of total<br/>Amitriptyline<br/>posts, N=100)</b> | <b>Venlafaxine<br/>(% of total<br/>Venlafaxine<br/>posts, N=130)</b> | <b>Total<br/>(% of total<br/>misuse/nonmedical<br/>use posts, N=668)</b> |
|-----------------------------------------------------------------------------------------------------------------------------------------------------------------------------------------------------------------------------------------------------------------------------------|--------------------------------------------------------------------------|--------------------------------------------------------------------------|----------------------------------------------------------------------|--------------------------------------------------------------------------|
| <b>Dosage information<br/>known</b>                                                                                                                                                                                                                                               | 123 (28%)                                                                | 35 (35%)                                                                 | 31 (24%)                                                             | 189 (28%)                                                                |
| <i>I've been using 75mg of venlafaxine, 25mg 5-htp, and 150mg bupropion twice daily the last few days. I took those things maybe 5 hours ago. An hour later I used 175mg ...</i>                                                                                                  |                                                                          |                                                                          |                                                                      |                                                                          |
| <b>Nonmedical use-<br/>encouraging</b>                                                                                                                                                                                                                                            | 54 (12%)                                                                 | 10 (10%)                                                                 | 14 (11%)                                                             | 78 (12%)                                                                 |
| <i>... maybe like a combo of cocaine and adderall without the paranoia or hot flashes..... Did find myself wanting to do it again and try increased dose..... Try it once yourself and see....</i>                                                                                |                                                                          |                                                                          |                                                                      |                                                                          |
| <b>Nonmedical use-<br/>discouraging</b>                                                                                                                                                                                                                                           | 178 (41%)                                                                | 22 (22%)                                                                 | 24 (18%)                                                             | 224 (34%)                                                                |
| <i>"I am sharing what happened so other won't do this. I took 800 mg and ....I went into convulsions! I could have died. Please PLEASE don't ever abuse Antidepressants"</i>                                                                                                      |                                                                          |                                                                          |                                                                      |                                                                          |
| <b>Neither nonmedical<br/>use-discouraging or<br/>encouraging-- a<br/>classification of<br/>"neither" was<br/>assigned if a post was<br/>both encouraging and<br/>discouraging</b>                                                                                                | 68 (16%)                                                                 | 19 (19%)                                                                 | 28 (22%)                                                             | 115 (17%)                                                                |
| <i>bupropion is sometimes referred to as crack so I would strongly suggest not mixing the two. This could cause seizure. However, you can have effects from snorting—it burns like h***. People have told me its better than adderal and they have abused it for a long time.</i> |                                                                          |                                                                          |                                                                      |                                                                          |
| <b>Procurement method<br/>mentioned (obtained<br/>or stolen from third<br/>party, illegal<br/>purchase, prescribed<br/>by health care<br/>provider, other)</b>                                                                                                                    | 38 (9%)                                                                  | 13 (13%)                                                                 | 11 (8%)                                                              | 62 (9%)                                                                  |
| <i>I got some venlafaxine from one friend who used it for fun a lot...</i>                                                                                                                                                                                                        |                                                                          |                                                                          |                                                                      |                                                                          |
| <b>Drugs combined for<br/>misuse/nonmedical<br/>use</b>                                                                                                                                                                                                                           | 72 (16%)                                                                 | 40 (40%)                                                                 | 27 (21%)                                                             | 139 (21%)                                                                |
| <i>...haven't tried amitriptyline before but I got access to 75mg pills, that I would probably cut in half or something since i've never done before. I know they're for sleep, but what if I mixed with a cocktail of kpin and cipralelex/lexapro.....</i>                       |                                                                          |                                                                          |                                                                      |                                                                          |
| <b>Mention of<br/>magnitude of<br/>misuse/nonmedical</b>                                                                                                                                                                                                                          | 112 (26%)                                                                | 17 (17%)                                                                 | 11 (8%)                                                              | 140 (21%)                                                                |

|                                                                                                                                                                                                 |         |        |        |         |
|-------------------------------------------------------------------------------------------------------------------------------------------------------------------------------------------------|---------|--------|--------|---------|
| <b>use within community</b>                                                                                                                                                                     |         |        |        |         |
| <i>Hopeful that someone experienced with this might reply. It's becoming quite popular in my area.<br/>My drug of choice is crack, but these pills [bup] are cheap &amp; easy to come by...</i> |         |        |        |         |
| <b>Mention of use within the criminal justice system</b>                                                                                                                                        | 19 (4%) | 4 (4%) | 0 (0%) | 23 (3%) |
| <i>another drug abused in the big house is Wellbutrin (bupropion), snorted for its stimulant effects...</i>                                                                                     |         |        |        |         |
