# Supplementary material for: Using Social Listening Data to Monitor Misuse and Nonmedical Use of Bupropion: A Content Analysis
Source: PubMed Central journal article supplement (PMC5311422; doi:10.2196/publichealth.6174), 2017-02-01
Supplement: publichealth_v3i1e6_app1.pdf [file publichealth_v3i1e6_app1.pdf]

|                                         |                                           |
|-----------------------------------------|-------------------------------------------|
| Accidental overdose                     | Intentional overdose                      |
| Dependence                              | Intentional product misuse                |
| Disturbance in social behaviour         | Intentional product use issue             |
| Dopamine dysregulation syndrome         | Maternal use of illicit drugs             |
| Drug abuse                              | Medication overuse headache               |
| Drug abuser                             | Narcotic bowel syndrome                   |
| Drug administered at inappropriate site | Needle track marks                        |
| Drug dependence                         | Neonatal complications of substance abuse |
| Drug dependence, antepartum             | Overdose                                  |
| Drug dependence, postpartum             | Polysubstance dependence                  |
| Drug detoxification                     | Prescribed overdose                       |
| Drug diversion                          | Prescription form tampering               |
| Drug level above therapeutic            | Rebound effect                            |
| Drug level increased                    | Steroid withdrawal syndrome               |
| Drug rehabilitation                     | Substance abuse                           |
| Drug screen                             | Substance abuser                          |
| Drug screen positive                    | Substance use                             |
| Drug tolerance                          | Substance-induced mood disorder           |
| Drug tolerance decreased                | Substance-induced psychotic disorder      |
| Drug tolerance increased                | Toxicity to various agents                |
| Drug withdrawal convulsions             | Withdrawal arrhythmia                     |
| Drug withdrawal headache                | Withdrawal syndrome                       |
| Drug withdrawal maintenance therapy     | Legal problem                             |
| Drug withdrawal syndrome                | Injection site reaction                   |
| Drug withdrawal syndrome neonatal       | Injection                                 |
