# Supplementary material for: Using Social Listening Data to Monitor Misuse and Nonmedical Use of Bupropion: A Content Analysis
Source: PubMed Central journal article supplement (PMC5311422; doi:10.2196/publichealth.6174), 2017-02-01
Supplement: publichealth_v3i1e6_app2.pdf [file publichealth_v3i1e6_app2.pdf]

| <b>Coder</b> | <b>Number of posts (N=7270)</b> |
|--------------|---------------------------------|
| Coder 1      | 254                             |
| Coder 2      | 198                             |
| Coder 3      | 2225                            |
| Coder 4      | 194                             |
| Coder 5      | 2102                            |
| Coder 6      | 281                             |
| Coder 7      | 174                             |
| Coder 8      | 590                             |
| Coder 9      | 200                             |
| Coder 10     | 204                             |
| Coder 11     | 848                             |
