# Supplementary material for: Using Social Listening Data to Monitor Misuse and Nonmedical Use of Bupropion: A Content Analysis
Source: PubMed Central journal article supplement (PMC5311422; doi:10.2196/publichealth.6174), 2017-02-01
Supplement: publichealth_v3i1e6_app3.pdf [file publichealth_v3i1e6_app3.pdf]

Is the post describing misuse or nonmedical use of the in-scope product(s)?  
What is the category of this post? (misuse, nonmedical use, other)  
Poster age range, gender, location, ethnicity  
Route of administration  
Length of use  
Dosage  
Is the poster encouraging or discouraging of the misuse or nonmedical use?  
Procurement method  
Desired effect from misuse or nonmedical use  
Misuse or nonmedical use outcome or effect  
Socioeconomic status  
Is the post author seeking information?  
Drugs combined for misuse or nonmedical use  
Magnitude of misuse or nonmedical use within the community  
Misuse or nonmedical use happening within the criminal justice system
