# Supplementary material for: Using Social Listening Data to Monitor Misuse and Nonmedical Use of Bupropion: A Content Analysis
Source: PubMed Central journal article supplement (PMC5311422; doi:10.2196/publichealth.6174), 2017-02-01
Supplement: publichealth_v3i1e6_app4.pdf [file publichealth_v3i1e6_app4.pdf]

Review New Post

Please note that while this post is open, no one else may edit it. Please complete the review before closing the window.

| SOURCE    | POST ID | POST DATE    | COUNTRY | IND SCORE | PROTO-AE/ MENTION | IME LISTED | REVIEWED |
|-----------|---------|--------------|---------|-----------|-------------------|------------|----------|
| Web Forum | 1234    | Dec 01, 2015 | Unknown | 0.5523    | Mention           | No         | Yes      |

| TAGGED PRODUCTS                                           | TAGGED AES                  |
|-----------------------------------------------------------|-----------------------------|
| wellbutrin <input type="text" value="Maps to Generic:"/>  | nonspecific reaction        |
| amphetamines <input type="text" value="Drug Not Mapped"/> | prescription form tampering |
| adderall <input type="text" value="Maps to Generic:"/>    |                             |
| amphetamine <input type="text" value="Maps to Brand:"/>   |                             |

**POST CATEGORIZATION**

Is this an abuse/misuse-related post or other post of interest for an in-scope product?

What is the category of this post?

Exclude post due to spam or advertisement?

**Post Content**  
 Were you taking **adderall**? Using more than 100mg over this short amount of time is a LOT. **wellbutrin** can be a substitute for **amphetamine** and has some stimulant effect. Use with care.

| Poster Information                                      | Product: wellbutrin [In Scope]                                                          |
|---------------------------------------------------------|-----------------------------------------------------------------------------------------|
| Patient Age Range: <input type="text" value="Unknown"/> | Route: <input type="text" value="Nasal insufflations (e.g., snorting)"/>                |
| Patient Gender: <input type="text" value="Unknown"/>    | Length of Use: <input type="text"/>                                                     |
| Poster Location: <input type="text"/>                   | Dosage: <input type="text"/>                                                            |
| Set Country: <input type="text" value="Unknown"/>       | Abuse endorsing or discouraging? <input type="text" value="Abuse - Discouraging"/>      |
|                                                         | Procurement Method: <input type="text" value="Unknown"/>                                |
|                                                         | Desired Effect: <input type="text" value="Unspecified high"/>                           |
|                                                         | Desired effect similar to: <input type="text"/>                                         |
|                                                         | Misuse/abuse outcome or effect: <input type="text" value="increase side effects as w"/> |

**Post Mentions**

Contains PII:       Drugs combined for abuse:

Socioeconomic Status:       Community Mention:

Ethnicity:       Happened within criminal justice system:

Seeking Info:       Include verbatim text:

Any additional comments:

Would you like to have someone else review this post?  
 Secondary Reviewer:
