# Supplementary material for: Using Social Listening Data to Monitor Misuse and Nonmedical Use of Bupropion: A Content Analysis
Source: PubMed Central journal article supplement (PMC5311422; doi:10.2196/publichealth.6174), 2017-02-01
Supplement: publichealth_v3i1e6_app5.pdf [file publichealth_v3i1e6_app5.pdf]

| Example ‘nonmedical use’ <sup>a,b</sup>                                                                                                                                                                                                                                                       | Example ‘misuse’ <sup>a,b</sup>                                                                                                                                                                                                                                                                                       |
|-----------------------------------------------------------------------------------------------------------------------------------------------------------------------------------------------------------------------------------------------------------------------------------------------|-----------------------------------------------------------------------------------------------------------------------------------------------------------------------------------------------------------------------------------------------------------------------------------------------------------------------|
| <p><i>I read an article online about a new kick in Chicago and other cities about the injection of Wellbutrin—it is referred to as the poor man’s cocaine. Tried it, and had a nice euphoria with increased energy.</i></p>                                                                   | <p><i>I am prescribed an antipsychotic, something for anxiety, and bupropion. I can have fun of it i just have to skip the bups and if i’m on them the anti-psychotics.</i></p>                                                                                                                                       |
| <p><i>We have been insufflating (snorting) bups. But this has been extremely painful and Im worried its damaging my sinus/nasal cavity. I have one friend who injects them but that is not an option for the rest of us.Is there a better way to take these and still feel an effect?</i></p> | <p><i>I have also been scripted Effexor—don’t know why. I am a daily marijuana smoker and enjoy using other drugs on a recreationally. Everything from cocaine to xanax. I may want to take a scrip holiday—any thoughts on withdrawal?</i></p>                                                                       |
| <p><i>Maybe effex? it has some opiod actions and it should be easy to get.</i></p>                                                                                                                                                                                                            | <p><i>I’ve got some amitrip tablets, using them to try and help me sleep, but i cant stay asleep for longer than a few hours after taking one, and have light sleep after that, waking up all the time. I was wondering if it would be safe to take 2 or 3 of them at once to try and stay asleep for longer?</i></p> |

<sup>a</sup>Posts have been modified in non-meaningful ways to protect the identity of the author.

<sup>b</sup>Posts were coded as nonmedical use or misuse regardless of if the action was only discussed or actually occurred.
